# Supplementary material
Source: publisher figshare collection journal article supplement (https://frontiersin.figshare.com/ndownloader/files/14837414)
Supplement: Supplementary file [file 14837414]

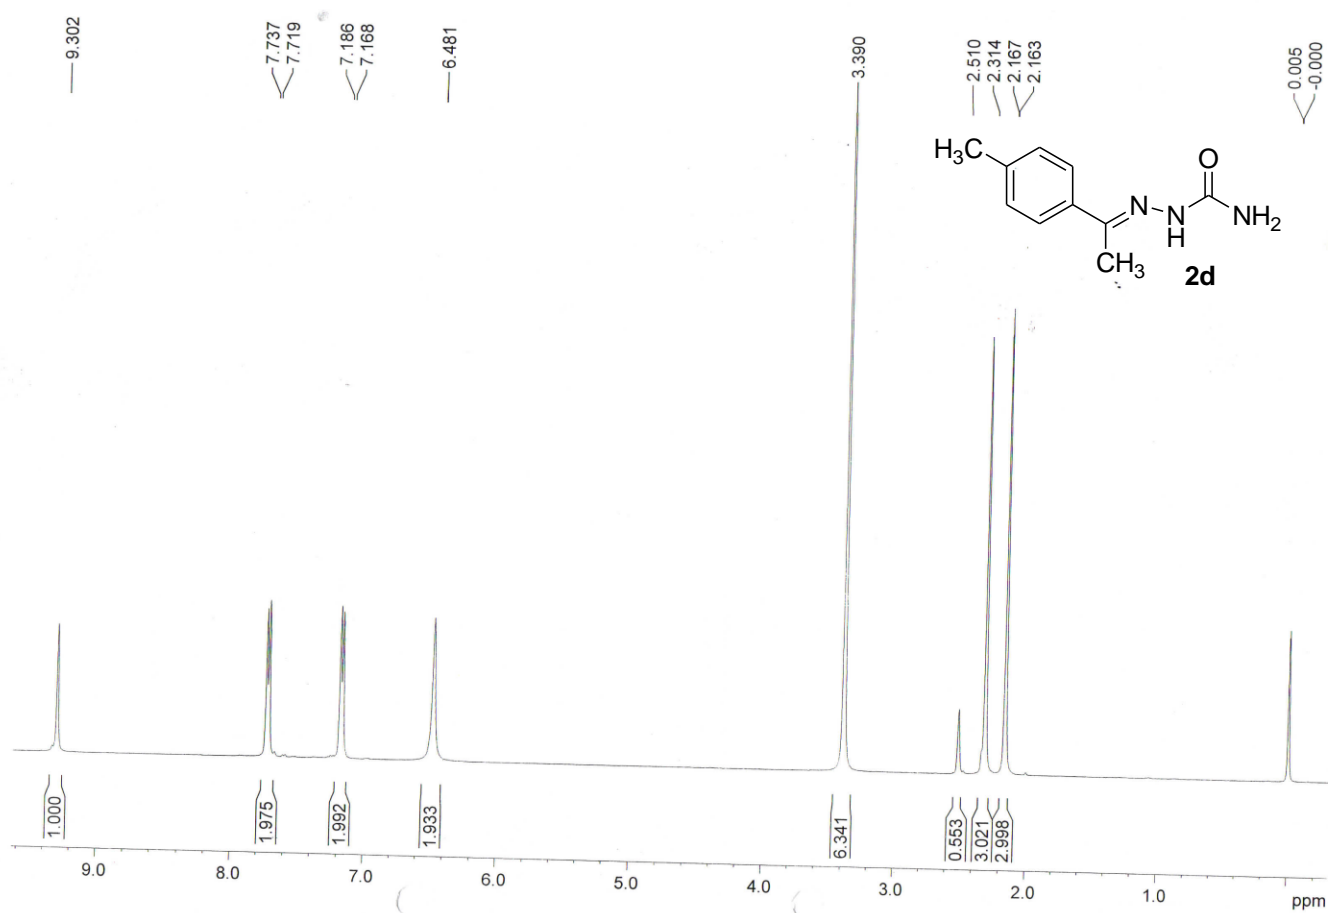

Fig. S29. <sup>1</sup>H NMR spectrum of compound **2d**

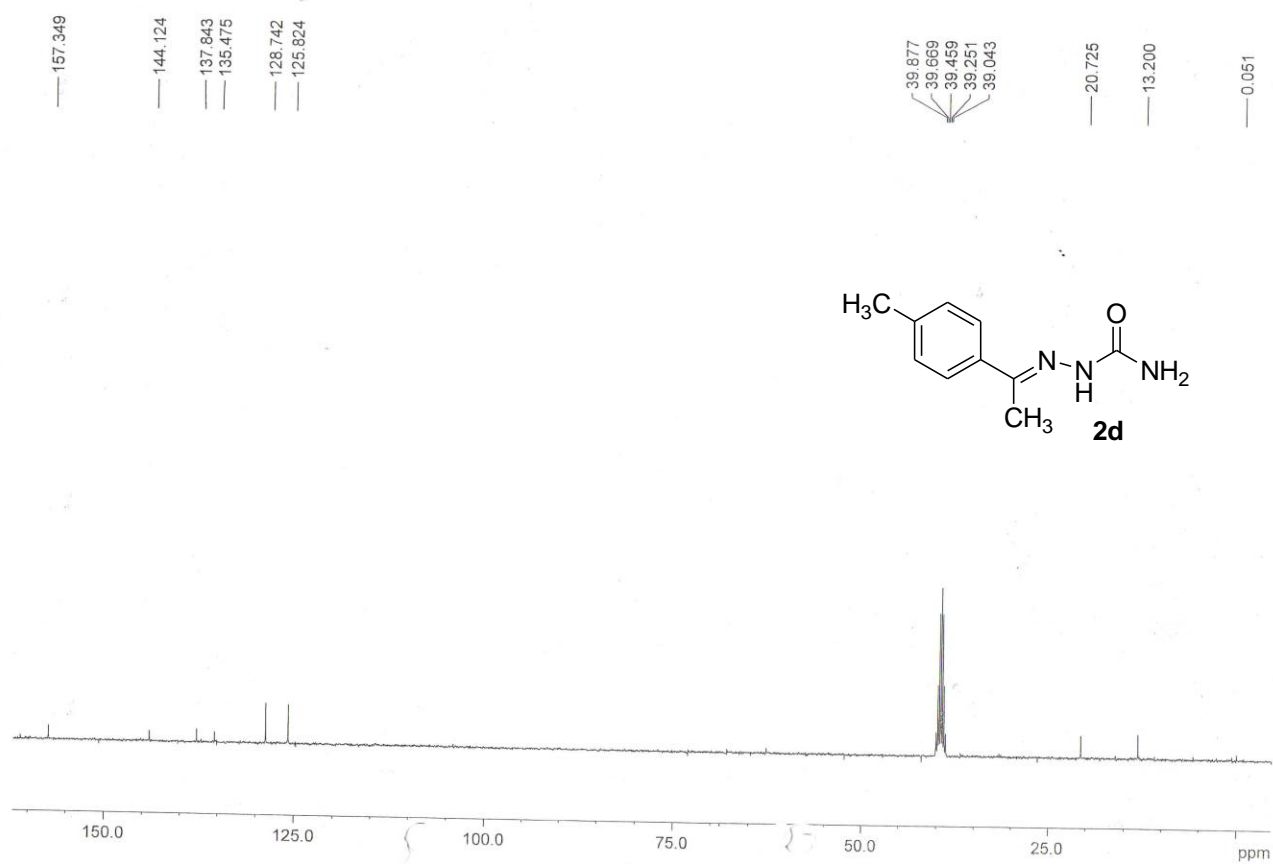

Fig. S29. <sup>13</sup>C NMR spectrum of compound **2d**

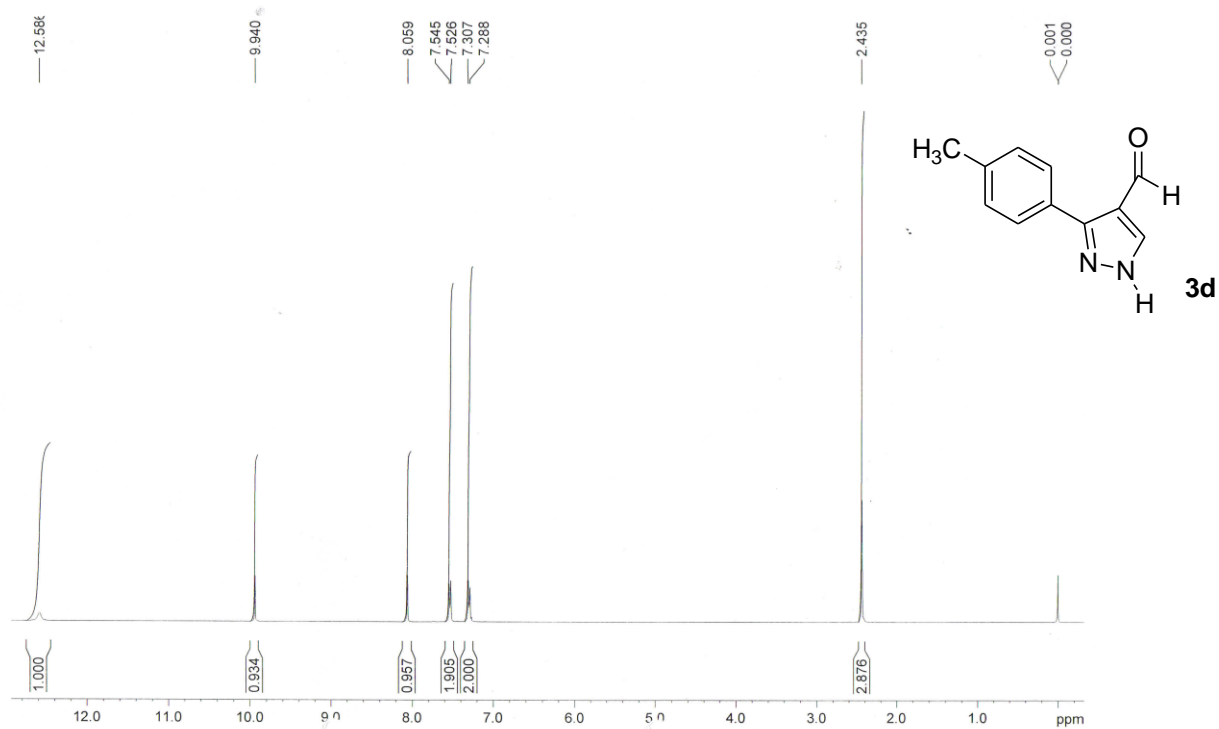

Fig. S30. <sup>1</sup>H NMR spectrum of compound **3d**

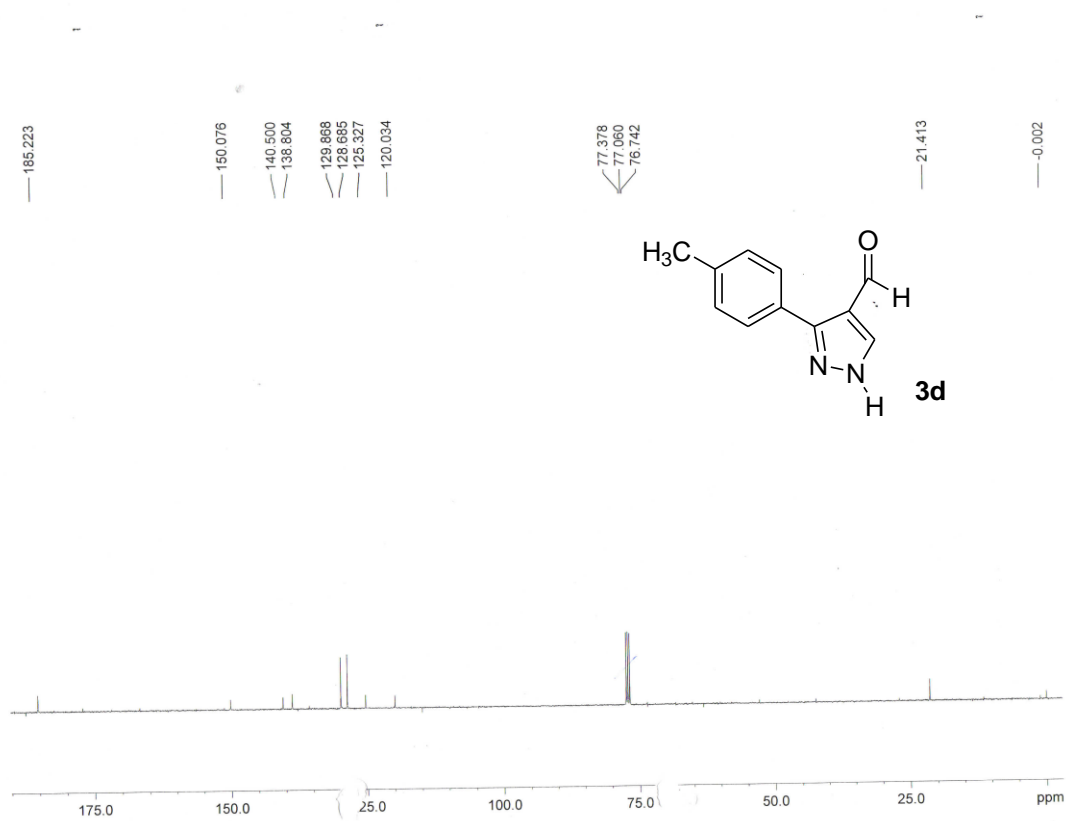

Fig. S30. <sup>13</sup>C NMR spectrum of compound **3d**

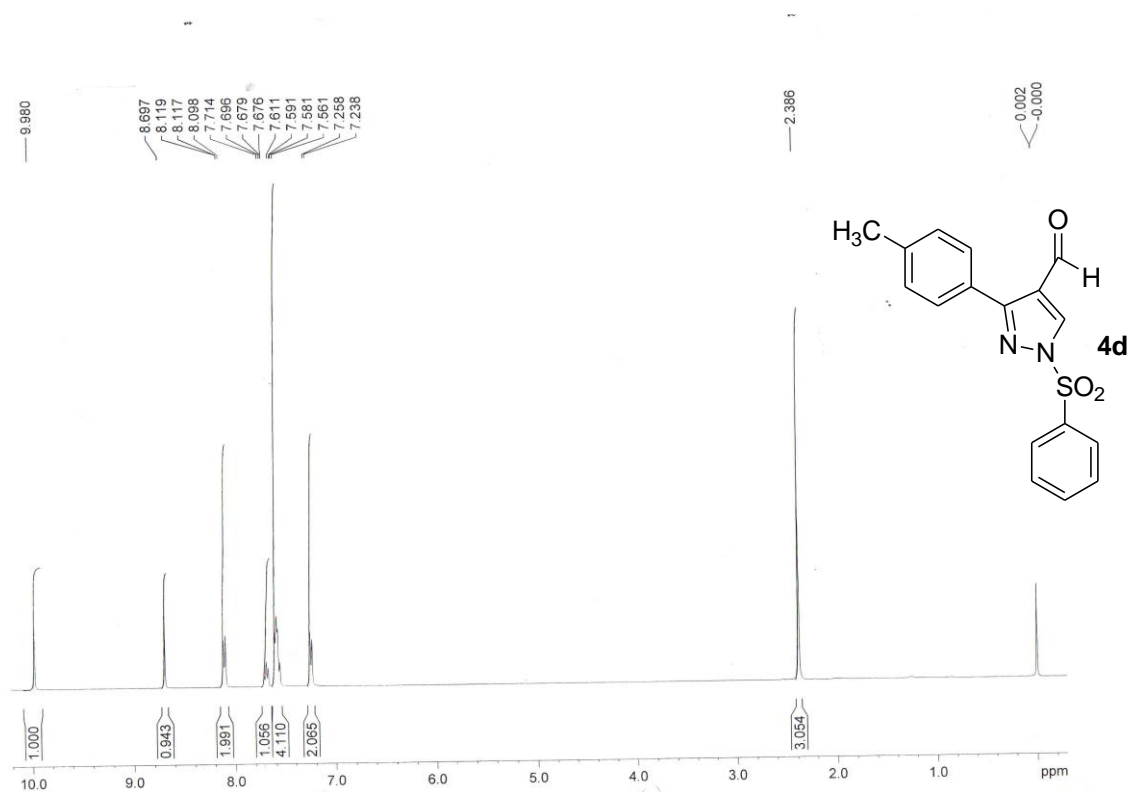

Fig. S31. <sup>1</sup>H NMR spectrum of compound **4d**

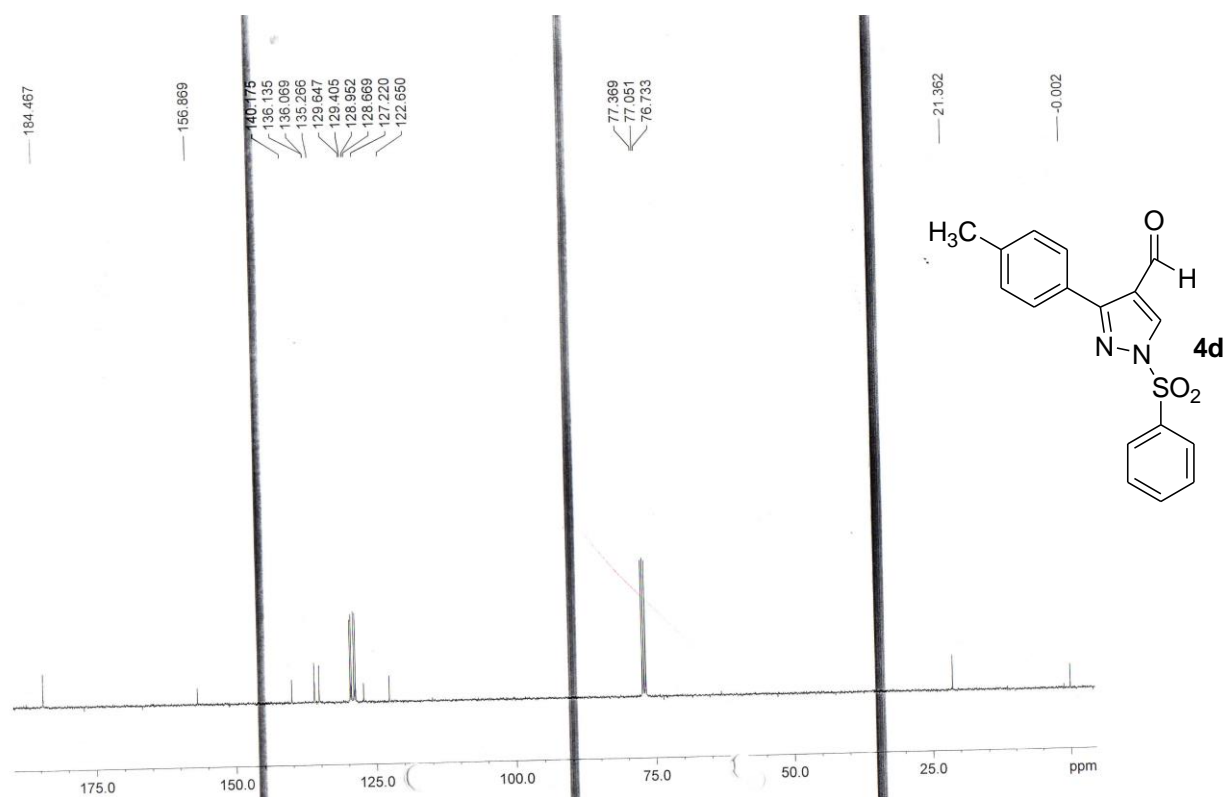

Fig. S31.  $^1\text{H}$  NMR spectrum of compound **4d**
